# Supplementary material
Source: Copernicus journal article supplement (doi:10.5194/egusphere-2026-1681)
Supplement: Supplementary file 1 [file egusphere-2026-1681-supplement.pdf]

*Supplement of*

**Global aerosol composition constraints from simultaneous data  
assimilation of satellite AOD and trace gas observations**

Takashi Sekiya et al.

**Correspondence:** Takashi Sekiya (tsekiya@jamstec.go.jp)

## S1 Data assimilation parameters

The optimal data assimilation setting can vary among different species and different observations, depending on typical lifetime in the atmosphere and spatial coverage of observations. Table S1 summarizes the evaluation results of the sensitivity data assimilation runs after a spin-up against AOD derived from MODIS. The RMS innovation was more than 23% larger in the  
5 assimilation with a localization length of 500 km than the other localization length (150 km and 1500 km), whereas correlation coefficient with a localization length of 500 km was larger than those with other lengths. Using the same localization length (500 km), increasing and decreasing emission inflation from the baseline setting degraded the correlation coefficient and RMS innovation. Thus, we selected the data assimilation parameter settings for assimilating AOD as described in Section ??.

## S2 Consistency with the assimilated AOD observations

10 The performance of AOD assimilation scheme newly implemented in this study was evaluated using the  $\chi^2$  test (Ménard and Chang, 2000; Zupanski and Zupanski, 2006). The  $\chi^2$  value was used to diagnose the balance between the actual and estimated errors and was calculated as the ratio of the observation minus the forecast (OmF; i.e.,  $\mathbf{y}^o - H(\mathbf{x}^f)$ ) to the estimated error covariance in the observation space ( $\mathbf{H}\mathbf{P}^f\mathbf{H}^T + \mathbf{R}$ ):

$$\mathbf{Y} = \frac{1}{\sqrt{N}} \left( \mathbf{H}\mathbf{P}^f\mathbf{H}^T + \mathbf{R} \right)^{-1/2} (\mathbf{y}^o - H(\mathbf{x}^f)), \quad (1)$$

15  $\chi^2 = \text{trace}\mathbf{Y}\mathbf{Y}^T.$  (2)

The mean  $\chi^2$  value with the standard deviation in GasAero DA was  $0.99 \pm 0.08$ , which suggests that the background and observational error covariances were well estimated.

As summarized in Table S2, we confirmed the self-consistency of GasAero DA with assimilated AOD observations over the globe. Compared to the control model simulation, the GasAero DA reduced the mean bias by 60%. Spatial correlation  
20 coefficient was increased from 0.7 in the control simulation to 0.88 due to GasAero DA, while RMSE was reduced by 36%.

## S3 Emission estimation scheme

To determine the emission optimization approach, the Observing System Simulation Experiments (OSSEs) with standard state augmentation and simplified version of a two-stage bias estimation approaches were performed. As summarized in Table S3, the two-stage bias estimation was characterized by better agreements with global dust emissions predicted in Nature run  
25 (true value) compared to the state augmentation (by 86%). For the global total emission of carbonaceous aerosols, these two approaches showed comparable performance. The errors in regional emission estimates over East Asia and Russia were reduced by 31–80% in the two-stage bias estimation, compared to the state augmentation, while the errors over South and Central Africa were increased by a factor of 2.

#### S4 Potential impacts of optimized ammonia emissions on aerosol analyses

30 Simultaneous assimilation of  $\text{NH}_3$  as well as  $\text{NO}_2$ ,  $\text{SO}_2$ , and AOD would be the efficient way to optimize sulfate-nitrate-ammonium aerosols comprehensively. Thus, we estimate  $\text{NH}_3$  emissions using Suomi-NPP/CrIS  $\text{NH}_3$  retrievals (REF) with a simple mass balance approach as did in Marais et al. (2021), and investigate the sensitivity of nitrate and ammonium aerosols to the optimized  $\text{NH}_3$  emissions. We calculate the optimized monthly mean  $\text{NH}_3$  emissions ( $E_{\text{CrIS}}$ ) at each model grid based on the CrIS  $\text{NH}_3$  retrievals, as follows:

$$35 \quad E_{\text{CrIS}} = C_{\text{CrIS}} \times \left( \frac{E}{C} \right)_{\text{DA}}, \quad (3)$$

where  $C_{\text{CrIS}}$  indicates surface  $\text{NH}_3$  concentrations derived from CrIS,  $(E/C)_{\text{DA}}$  is the ratio of monthly mean  $\text{NH}_3$  emissions to monthly mean surface  $\text{NH}_3$  concentrations sampled at 13:30LT obtained from the data assimilation calculation. The performance of the mass balance approach is affected by a failure of spatial attribution of emission sources owing to horizontal displacement of  $\text{NH}_3$ . The length of displacement was estimated to vary within 10–105 km, depending on meteorological and photochemical conditions Marais et al. (2021). The longer limit of length is comparable to the model grid size.

Figure S1 exhibited global distribution of surface  $\text{NH}_3$  concentrations during May–August 2016 derived from the CrIS retrievals and data assimilation. The CrIS retrievals show high  $\text{NH}_3$  concentrations over North and Central Africa, northern India, Malay Peninsula, Central Eastern China, the midwest United States, and South America. Data assimilation with the CEDS emission inventory (v\_2021\_04\_21) overestimated the observed surface  $\text{NH}_3$  concentrations over Central Africa, northern India, mainland China, Malay Peninsula, and the southeastern United States typically by 3–10 ppbv, whereas the data assimilation underestimated the observed  $\text{NH}_3$  over North Africa, the Great Plains, and South America typically by 3–5 ppbv. In the model simulation using the optimized  $\text{NH}_3$  emissions, positive and negative biases were substantially reduced compared to the data assimilation, except for North Africa.

The global total  $\text{NH}_3$  emission during May–August 2016 was increased to 45.8 Tg N yr<sup>-1</sup> from 27.5 Tg N yr<sup>-1</sup> in the a priori emissions. The optimized global total emission was smaller but closer to those (55–64 Tg N yr<sup>-1</sup>) derived from previous studies (Zhu et al., 2013; Paulot et al., 2014) than the a priori emissions. The optimized regional total emission in the United States was increased from 1.6 Tg N yr<sup>-1</sup> in the a priori emissions to 3.3 Tg N yr<sup>-1</sup>, which ranged within the range of 2.8–7.9 Tg N yr<sup>-1</sup> obtained from previous studies (Zhu et al., 2013; Paulot et al., 2014; Cao et al., 2020; Sitwell et al., 2022). Furthermore, nitrate and ammonium aerosol concentrations were increased typically by 0.5–1.0  $\mu\text{g m}^{-3}$  over North and South Africa, West Asia, South America, and were decreased typically by 0.5 ppbv over Europe, China, and eastern United States, and Middle East by the  $\text{NH}_3$  emission optimization. These modifications partially reduced remaining biases relative to surface in-situ observations of nitrate and ammonium aerosols.

Further investigation would be required to elucidate whether these model biases are attributed to  $\text{NH}_3$  emissions or model processes. The AeroCom model intercomparison highlighted that negative biases in the simulations can result from significant uncertainties in the wet deposition process, where the effective Henry's law constant for ammonia varies by an order of six among different global chemical transport models (Bian et al., 2017). In addition, the lack of  $\text{NH}_3$  recycling processes between the atmosphere and soil further contributes to these biases. Zhu et al. (2015) and Cao et al. (2022) demonstrated that the imple-

mentation of a bi-directional flux scheme mitigated these. To further improve the representation of sulfate-nitrate-ammonium aerosols in the data assimilation, the effective way would be to incorporate improved model schemes and to simultaneously  
65 assimilate  $\text{SO}_2$ ,  $\text{NO}_2$ , along with  $\text{NH}_3$  observations.

**Table S1.** Correlation Coefficients and Root Mean Square (RMS) Innovations of Observation-Minus-Forecast (OmF) for AOD during July 2016. L and INF indicate the horizontal localization length for AOD and inflation factor for aerosol emissions.

| Experiment description                                              | correlation coefficient | RMS innovation |
|---------------------------------------------------------------------|-------------------------|----------------|
| Standard setting (L: 500 km, INF: baseline)                         | 0.852                   | 0.080          |
| Shorter localization length (L: 150 km, INF: baseline)              | 0.788                   | 0.104          |
| Longer localization length (L: 1500 km, INF: baseline)              | 0.748                   | 0.120          |
| Smaller emission inflation (L: 500 km, INF: baseline $\times$ 0.33) | 0.723                   | 0.125          |
| Larger emission inflation (L: 500 km, INF: baseline $\times$ 3)     | 0.099                   | 87.8           |

**Table S2.** Statistical scores of self-consistency check with assimilated observations for the GasAero DA during May–August 2016. MB, S-Corr, and RMSE indicate mean bias, spatial correlation coefficient, and root mean square error, respectively.

| Observation data     | GasAero DA |        |      | Aero-only DA |        |      | CTL   |        |      |
|----------------------|------------|--------|------|--------------|--------|------|-------|--------|------|
|                      | MB         | S-Corr | RMSE | MB           | S-Corr | RMSE | MB    | S-Corr | RMSE |
| Terra+Aqua/MODIS AOD | -0.02      | 0.88   | 0.07 |              |        |      | -0.05 | 0.7    | 0.11 |

**Table S3.** Estimates of carbonaceous and dust aerosols during August 2016 using the Observing System Simulation Experiments (OSSEs) framework. The unit is Tg month<sup>-1</sup>. Nature run is treated as true value and synthetic observations were generated from Nature run with the typical MODIS observation errors. Control run is the same as Nature run, but the global emissions were reduced by 68% with random spatial variations. Conventional and New scheme indicate the OSSE DA calculation with emission inversion schemes using state augmentation methods and simplified version of a two-stage bias estimation algorithm, respectively.

| Experiment ID | Carbonaceous aerosol |           |                      |        | Dust   |           |              |             |
|---------------|----------------------|-----------|----------------------|--------|--------|-----------|--------------|-------------|
|               | Global               | East Asia | South/Central Africa | Russia | Global | East Asia | North Africa | Middle East |
| Nature run    | 10.4                 | 0.62      | 3.7                  | 0.88   | 460    | 186       | 70           | 57          |
| Control run   | 4.4                  | 0.47      | 0.78                 | 0.14   | 197    | 58        | 79           | 19          |
| Conventional  | 10.3                 | 0.42      | 4.0                  | 1.2    | 571    | 227       | 101          | 69          |
| New scheme    | 11.1                 | 0.59      | 4.3                  | 1.1    | 476    | 189       | 82           | 59          |

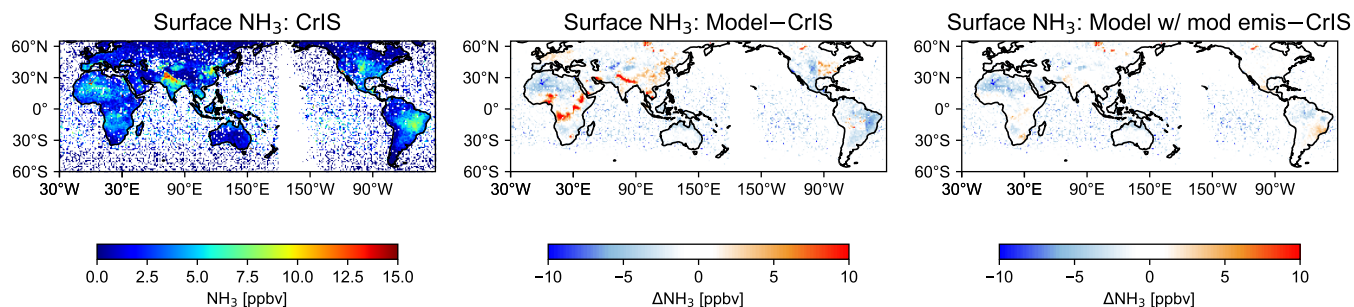

**Figure S1.** Surface  $\text{NH}_3$  concentrations derived from Suomi-NPP/CrIS (left), and the differences between CrIS and the model simulations using the optimized aerosol and its precursor emissions (center and right). A model simulation used a priori  $\text{NH}_3$  emissions (center), whereas another model simulation used the optimized  $\text{NH}_3$  emissions based on the comparison to the CrIS retrievals. The unit is ppbv.

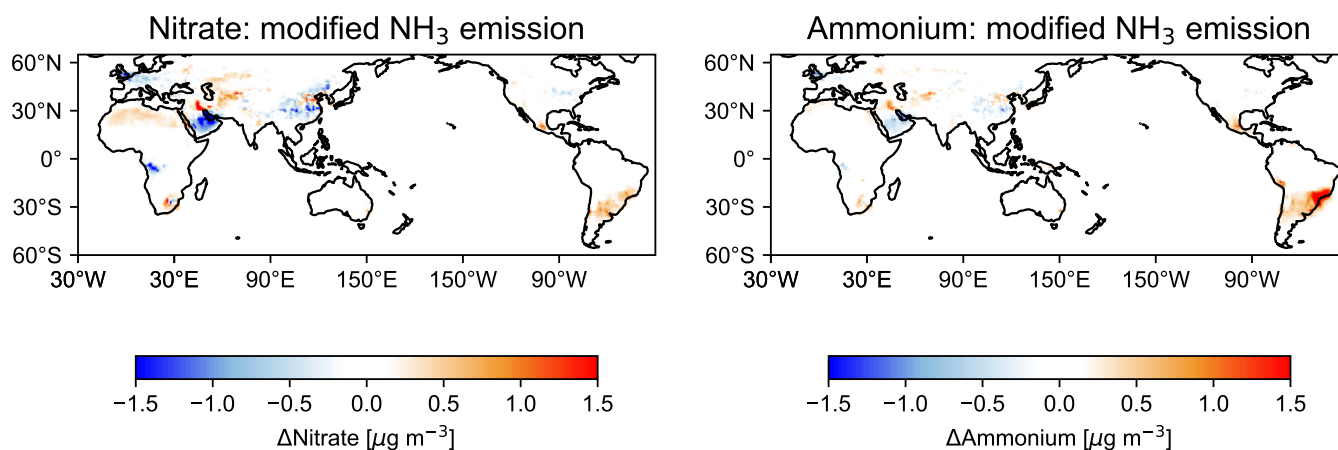

**Figure S2.** Changes in surface nitrate (left) and ammonium concentrations (right) due to  $\text{NH}_3$  emission optimization based on the comparison to the CrIS  $\text{NH}_3$  retrievals. The unit is  $\mu\text{g m}^{-3}$ .

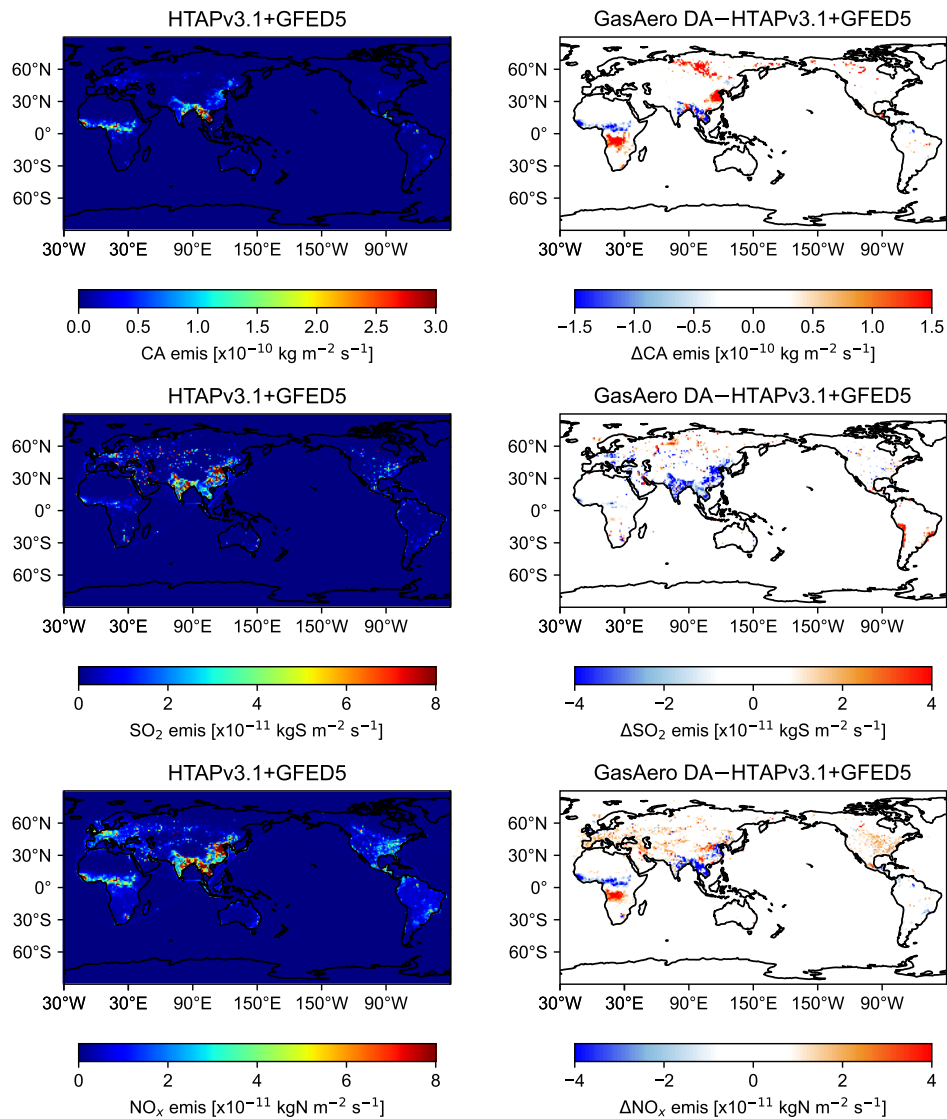

**Figure S3.** Bottom-up emission estimates obtained from the HTAPv3.1 and GFED5 inventories (left) and their differences from top-down emission estimates derived from GasAero DA (right). The top, middle, and bottom rows are carbonaceous aerosol, SO<sub>2</sub>, and NO<sub>x</sub> emissions, respectively. The units of carbonaceous aerosol, SO<sub>2</sub>, and NO<sub>x</sub> emissions are kg m<sup>-2</sup> s<sup>-1</sup>, kg S m<sup>-2</sup> s<sup>-1</sup>, and kg N m<sup>-2</sup> s<sup>-1</sup>, respectively.

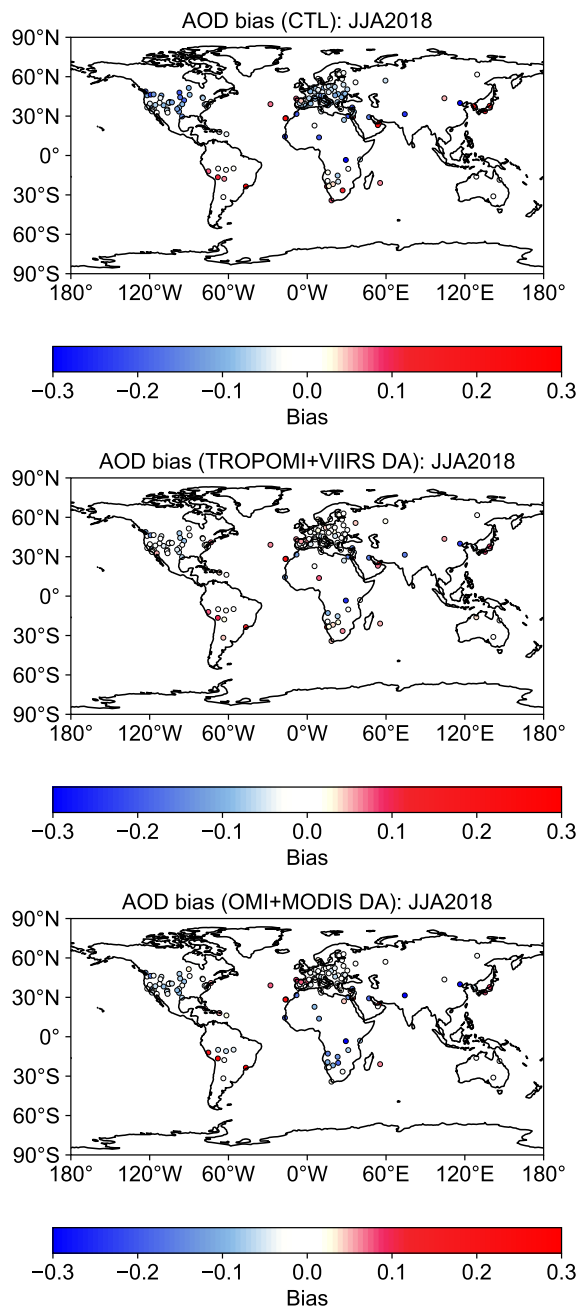

**Figure S4.** Mean AOD biases against AERONET at individual sites obtained from the CTL simulation (top), TROPOMI+VIIRS DA (middle), and OMI+MODIS DA (bottom) for June–August, 2018.

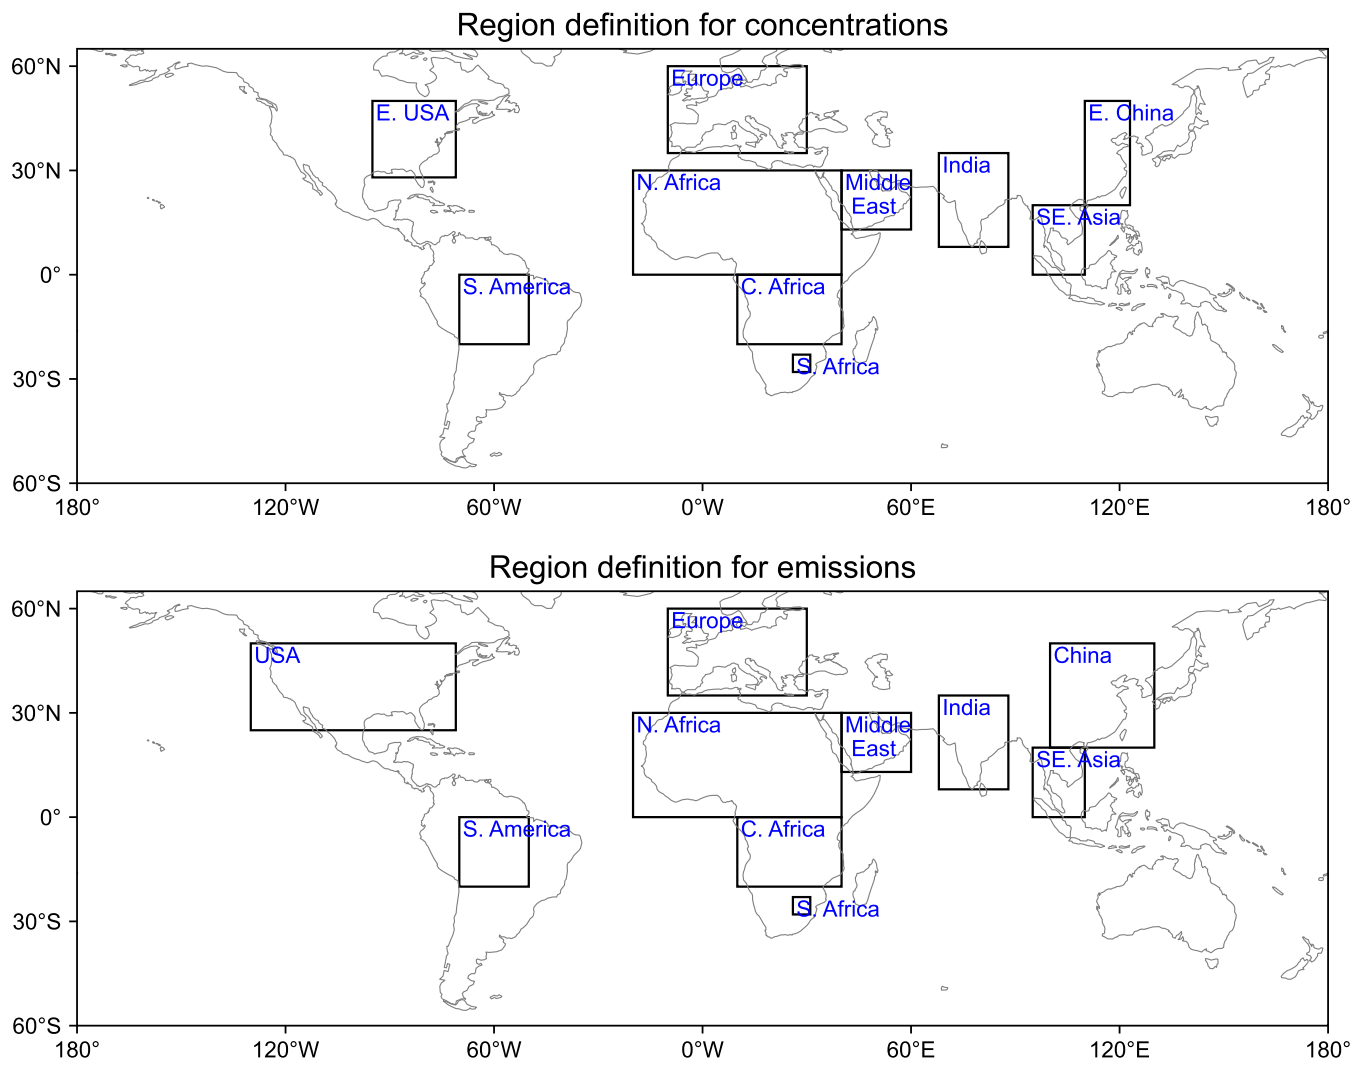

**Figure S5.** Region definitions used for  $PM_{2.5}$  concentrations and their composition (top) and emission estimates (bottom).

## References

- Bian, H., Chin, M., Hauglustaine, D. A., Schulz, M., Myhre, G., Bauer, S. E., Lund, M. T., Karydis, V. A., Kucsera, T. L., Pan, X., Pozzer, A., Skeie, R. B., Steenrod, S. D., Sudo, K., Tsigaridis, K., Tsimpidi, A. P., and Tsyro, S. G.: Investigation of global particulate nitrate from the AeroCom phase III experiment, *Atmos. Chem. Phys.*, 17, 12 911–12 940, <https://doi.org/10.5194/acp-17-12911-2017>, 2017.
- 70 Cao, H., Henze, D. K., Shephard, M. W., Dammers, E., Cady-Pereira, K., Alvarado, M., Lonsdale, C., Luo, G., Yu, F., Zhu, L., Danielson, C. G., and Edgerton, E. S.: Inverse modeling of NH<sub>3</sub> sources using CrIS remote sensing measurements, *Environ. Res. Lett.*, 15, 104 082, <https://doi.org/10.1088/1748-9326/abb5cc>, 2020.
- Cao, H., Henze, D. K., Zhu, L., Shephard, M. W., Cady-Pereira, K., Dammers, E., Sitwell, M., Heath, N., Lonsdale, C., Bash, J. O., Miyazaki, K., Flechard, C., Fauvel, Y., Kruit, R. W., Feigenspan, S., Brümmner, C., Schrader, F., Twigg, M. M., Leeson, S., Tang, Y. S., Stephens, 75 A. C. M., Braban, C., Vincent, K., Meier, M., Seitler, E., Geels, C., Ellermann, T., Sanocka, A., and Capps, S. L.: 4D-Var Inversion of European NH<sub>3</sub> Emissions Using CrIS NH<sub>3</sub> Measurements and GEOS-Chem Adjoint With Bi-Directional and Uni-Directional Flux Schemes, *J. Geophys. Res.*, 127, e2021JD035 687, <https://doi.org/10.1029/2021JD035687>, 2022.
- Marais, E. A., Pandey, A. K., Van Damme, M., Clarisse, L., Coheur, P.-F., Shephard, M. W., Cady-Pereira, K. E., Misselbrook, T., Zhu, L., Luo, G., and Yu, F.: UK Ammonia Emissions Estimated With Satellite Observations and GEOS-Chem, *J. Geophys. Res.*, 126, 80 e2021JD035 237, <https://doi.org/10.1029/2021JD035237>, 2021.
- Ménard, R. and Chang, L.-P.: Assimilation of Stratospheric Chemical Tracer Observations Using a Kalman Filter. Part II:  $\chi^2$ -Validated Results and Analysis of Variance and Correlation Dynamics, *Mon. Weather Rev.*, 128, 2672–2686, [https://doi.org/10.1175/1520-0493\(2000\)128<2672:AOSCTO>2.0.CO;2](https://doi.org/10.1175/1520-0493(2000)128<2672:AOSCTO>2.0.CO;2), 2000.
- Paulot, F., Jacob, D. J., Pinder, R. W., Bash, J. O., Travis, K., and Henze, D. K.: Ammonia emissions in the United States, European Union, and 85 China derived by high-resolution inversion of ammonium wet deposition data: Interpretation with a new agricultural emissions inventory (MASAGE\_NH<sub>3</sub>), *J. Geophys. Res.*, 119, 4343–4364, <https://doi.org/https://doi.org/10.1002/2013JD021130>, 2014.
- Sitwell, M., Shephard, M. W., Rochon, Y., Cady-Pereira, K., and Dammers, E.: An ensemble-variational inversion system for the estimation of ammonia emissions using CrIS satellite ammonia retrievals, *Atmos. Chem. Phys.*, 22, 6595–6624, <https://doi.org/10.5194/acp-22-6595-2022>, 2022.
- 90 Zhu, L., Henze, D. K., Cady-Pereira, K. E., Shephard, M. W., Luo, M., Pinder, R. W., Bash, J. O., and Jeong, G.-R.: Constraining U.S. ammonia emissions using TES remote sensing observations and the GEOS-Chem adjoint model, *J. Geophys. Res.*, 118, 3355–3368, <https://doi.org/https://doi.org/10.1002/jgrd.50166>, 2013.
- Zhu, L., Henze, D., Bash, J., Jeong, G.-R., Cady-Pereira, K., Shephard, M., Luo, M., Paulot, F., and Capps, S.: Global evaluation of ammonia bidirectional exchange and livestock diurnal variation schemes, *Atmos. Chem. Phys.*, 15, 12 823–12 843, <https://doi.org/10.5194/acp-15-12823-2015>, 2015.
- 95 Zupanski, D. and Zupanski, M.: Model Error Estimation Employing an Ensemble Data Assimilation Approach, *Mon. Weather Rev.*, 134, 1337–1354, <https://doi.org/10.1175/MWR3125.1>, 2006.
